# Supplementary material for: A novel enhanced visible-light-driven photocatalyst via hybridization of nanosized BiOCl and graphitic C3N4
Source: Royal Society of Chemistry journal article supplement (doi:10.1039/c4dt02082k), 2014-11-05
Supplement: c4dt02082k1.pdf [file c4dt02082k1.pdf]

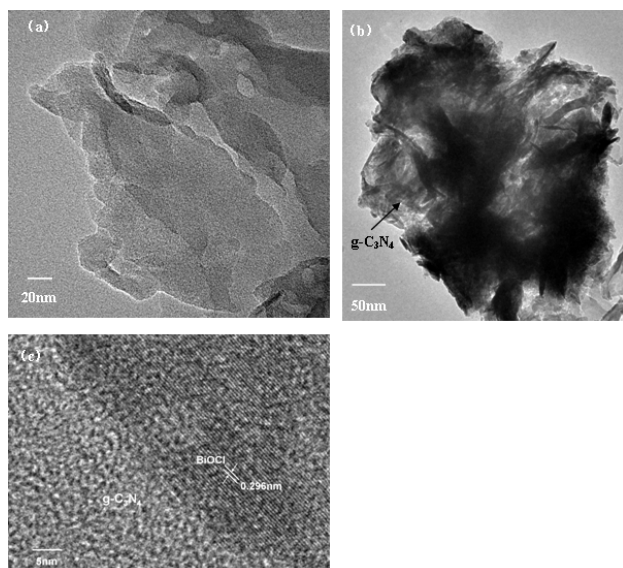

5 **Fig.S1** HRTEM images of (a)  $g-C_3N_4$  (b)(c)  $20C_3N_4/BiOCl$  photocatalysts

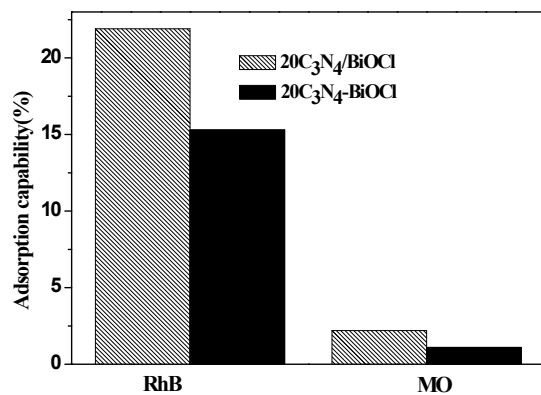

10 **Fig.S2** Adsorption capability of RhB and MO over  $20C_3N_4/BiOCl$  and  $20C_3N_4-BiOCl$  photocatalysts
